# Supplementary material for: High-efficiency perovskite quantum dot solar cells benefiting from a conjugated polymer-quantum dot bulk heterojunction connecting layer
Source: Royal Society of Chemistry journal article supplement (doi:10.1039/d0ta02743j), 2020-01-01
Supplement: d0ta02743j1.pdf [file d0ta02743j1.pdf]

Electronic Supplementary Information (ESI)

**High-Efficiency Perovskite Quantum Dot Solar Cells Benefiting  
from a Conjugated Polymer-Quantum Dot Bulk Heterojunction  
Connecting Layer**

Kang Ji,<sup>a</sup> Jiabei Yuan,<sup>a</sup> Fangchao Li,<sup>a</sup> Yao Shi,<sup>a</sup> Xufeng Ling,<sup>a</sup> Xuliang Zhang,<sup>a</sup> Yannan Zhang,<sup>a</sup> Huiyu Lu,<sup>a</sup> Jianyu Yuan,<sup>a,\*</sup> and Wanli Ma<sup>a,\*</sup>

Jiangsu Key Laboratory for Carbon-Based Functional Materials & Devices, Institute of Functional Nano & Soft Materials (FUNSOM), Soochow University, Suzhou 215123, China.

Email: [jyyuan@suda.edu.cn](mailto:jyyuan@suda.edu.cn) (J. Yuan); [wlma@suda.edu.cn](mailto:wлма@suda.edu.cn) (W. Ma)

## 1. Materials

Formamidinium acetate (FAOAc, 99%, Aldrich), cesium carbonate ( $\text{Cs}_2\text{CO}_3$ , 99.9% purity, Sigma), lead iodine ( $\text{PbI}_2$ , 99.9% purity, Sigma), 1-octadecene (ODE, 90% purity, J&K), oleic acid (OA, 90% purity, Alfa), oleylamine (OAm, 90% purity, Alfa), n-hexane (97.5% purity, J&K), n-octane (anhydrous,  $\geq 98\%$  purity, Alfa), chloroform (CF, AR, Chinasun Specialty Products Co.,Ltd.), methyl acetate (MeOAc, anhydrous, 99.5% purity, Sigma), ethyl acetate (EtOAc, anhydrous, 99.8% purity, Sigma), toluene (98% purity, Chinasun Specialty Products Co., Ltd.), titanium tetrachloride ( $\text{TiCl}_4$ ,  $\geq 98\%$  purity, Sinopharm Chemical Reagent Co.,Ltd.), tris(pentafluorophenyl)borane (95% purity, Acros Organics), poly(triarylamine) (PTAA) are purchased from Xi'an Polymer Light Technology Corp. (China). PTB7, PBDB-T, PCE-10 was purchased from 1-Materials and PTP8 was synthesized according to our previous reported work.<sup>1</sup> All the above materials were employed without further purification.

## 2. Synthesis of $\text{CsPbI}_3$ and $\text{FAPbI}_3$ QDs

*For the synthesis of Cs-oleate:* 0.5 g of  $\text{Cs}_2\text{CO}_3$  powder, 2 mL of OA and 50 mL of ODE were mixed in a 100 mL three-neck flask, stirring at 90 °C for 60 min under vacuum to prepare Cs-oleate. Then, the flask was filled with  $\text{N}_2$  and heated up to 120 °C until OA and  $\text{Cs}_2\text{CO}_3$  fully reacted to form Cs-oleate. The Cs-oleate was stored at  $\text{N}_2$  atmosphere and kept at 70 °C for QDs synthesis.

*For the synthesis of FA-oleate:* 2.605 g of FA-acetate powder and 50 mL of OA were added into a 100 mL three-neck flask and stirred under vacuum at 50 °C for one hour to synthesize FA-oleate. Then, the flask was heated up to 120 °C with  $\text{N}_2$  through and kept for half an hour. Finally, FA-oleate was cooled to 70 °C and stored at  $\text{N}_2$  atmosphere.

*For the synthesis of  $\text{CsPbI}_3$  QDs:* 1 g of  $\text{PbI}_2$  and 50 mL of ODE were loaded into a 250 mL three-neck flask, stirring and heating up to 90 °C for 1 hour under vacuum. Then, 5 mL OA and 5 mL OAm were injected with constant  $\text{N}_2$  flow. The flask was degassed at 90 °C for 2 h and then refilled with  $\text{N}_2$  and heated up to 160 °C. 8 mL of

preheated Cs-oleate in ODE was rapidly injected into the reaction system with constant N<sub>2</sub> flow. The reaction mixture turned into dark red immediately and the flask was quenched by an ice bath after 5 s. When the QD temperature reduced into 50 °C, CsPbI<sub>3</sub> QDs were transferred into a transferring bottle filled with nitrogen. Then, CsPbI<sub>3</sub> QDs were separated into six centrifuge tubes equally, then antisolvent MeOAc with volume ratio of 1:3 (QDs: MeOAc = 1:3 in v:v) was added, centrifuging with speed of 8000 rpm for 5 min. The precipitate was dispersed with 3 mL of n-hexane in each centrifuge tube, and same volume of MeOAc was added afterwards, and again centrifuged at 8000 rpm for 3 min. Finally, the precipitate was dissolved with 20 mL n-hexane and centrifuged at 4000 rpm for 5 min to remove excess PbI<sub>2</sub> and Cs-oleate. The supernatant QDs were stored in dark at 0 °C overnight to precipitate excess Cs-oleate and Pb-oleate. Before use, the QDs were centrifuged at 4000 RPM for 5 min to remove excess precipitate and then dried to achieve QD solids.

*For the synthesis of FAPbI<sub>3</sub> QDs:* The FAPbI<sub>3</sub> QDs were synthesized according to our recent report: 0.688 g PbI<sub>2</sub> and 40 mL 1-ODE were degassed under vacuum at 120 °C for 30 min. A mixture of 8 mL of OA and 4 mL of OAm was then injected into the reaction mixture under vacuum. The mixture was degassed under vacuum until the reaction mixture became clear. Under N<sub>2</sub> flow, the temperature was decreased to 80 °C. Then 10 mL as prepared FA-oleate stock solution was then rapidly injected into the reaction flask. After 5 s, the reaction mixture was quenched using an ice-water bath. FAPbI<sub>3</sub> QDs were then transferred into a transferring bottle filled with nitrogen. After the mixture cooled to room temperature, 2-pentanol was added (1:1 v:v ratio), and the mixture was centrifuged at 8000 rpm for 5 min. The resulting QD precipitate was dispersed in 14 mL hexane, re-precipitated with mixed ACN/toluene (1:4 v:v ratio), and centrifuged at 8000 rpm for 2 min. After discarding the supernatant, the final precipitate was redispersed in 10 mL of octane and centrifuged at 10000 rpm for 3 min to remove the FAPbI<sub>3</sub> clusters. All the purification process was conducted in the N<sub>2</sub> environment. Then the QD solution will be stored in the fridge at 0 °C for 24 hours to finally remove excess PbI<sub>2</sub> and FA-oleate. Before use,

the QDs were centrifuged at 10000 RPM for 5 min to remove excess precipitate and then dried to achieve QD solids.

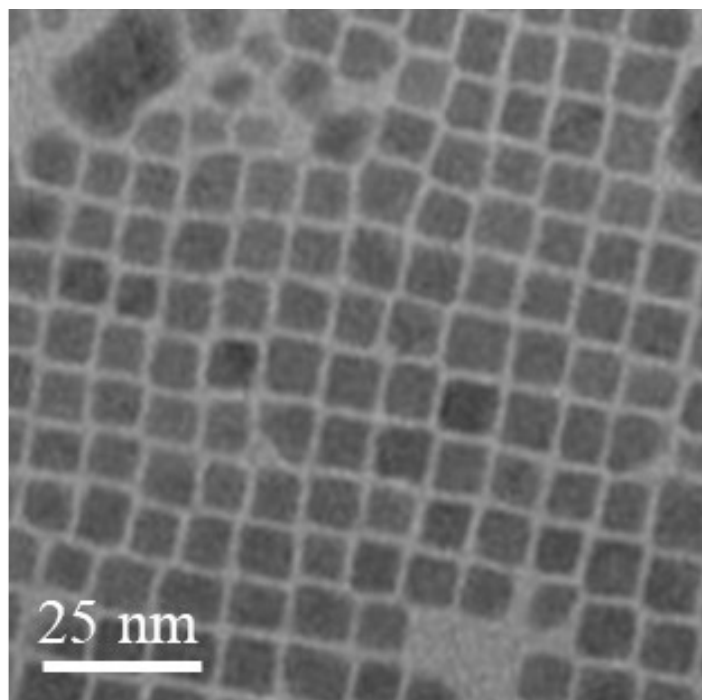

Figure S1. TEM image of CsPbI<sub>3</sub> PQDs.

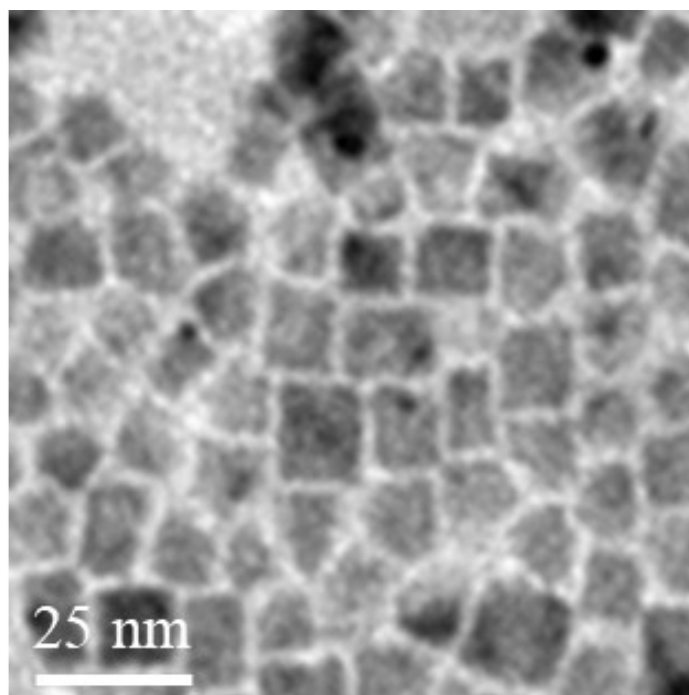

Figure S2. TEM image of FAPbI<sub>3</sub> QDs.

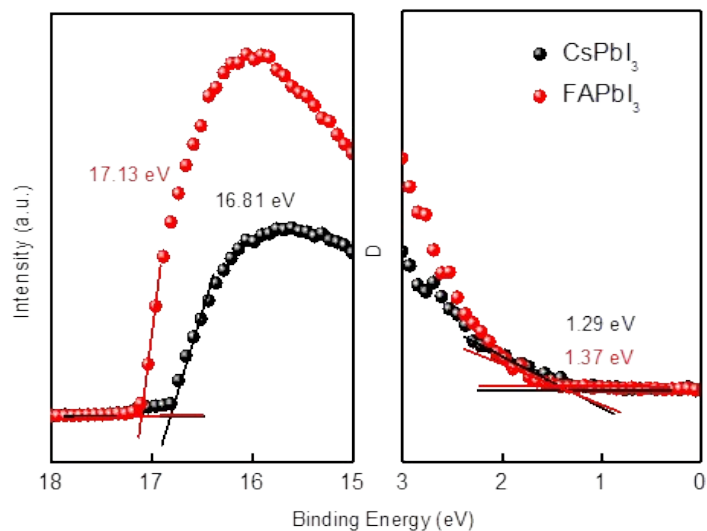

Figure S3. UPS spectra of CsPbI<sub>3</sub> and FAPbI<sub>3</sub> QD film after MeOAc post-treatment.

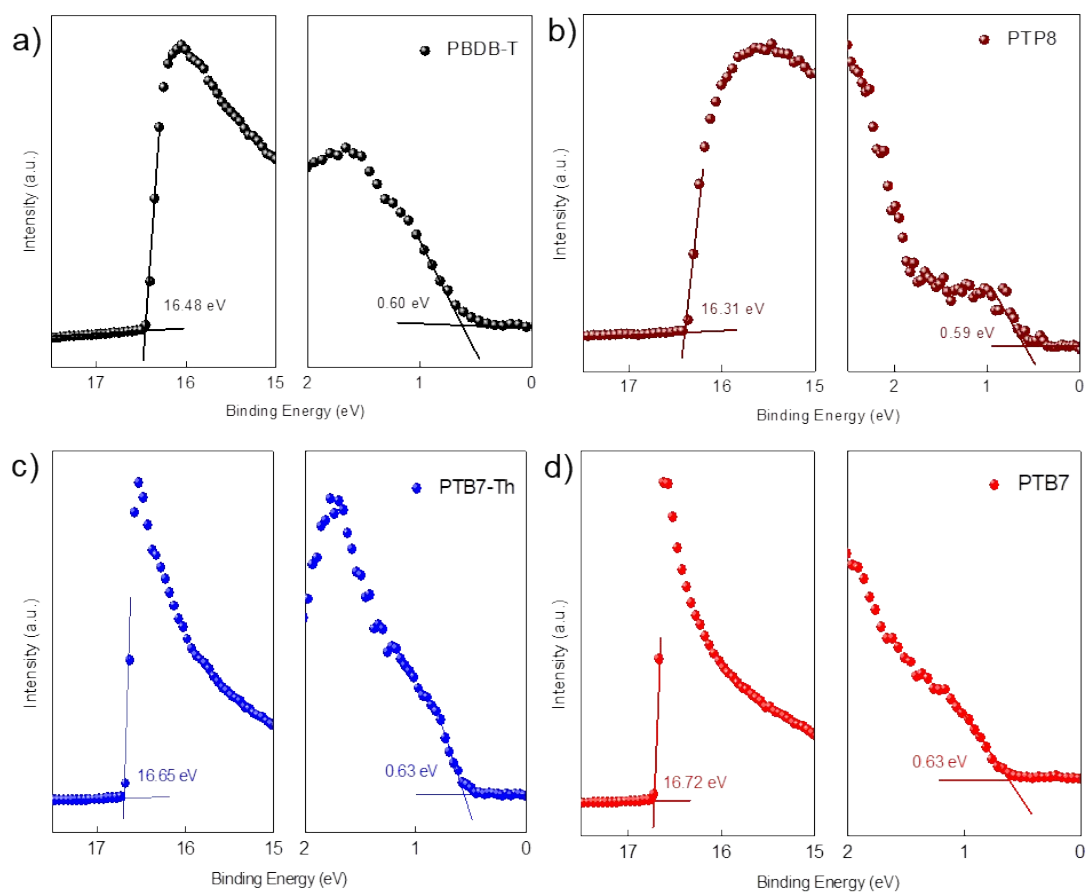

Figure S4. UPS spectra of PBDB-T (a), PTP8 (b), PTB7-Th (c) and PTB7 (d) film.

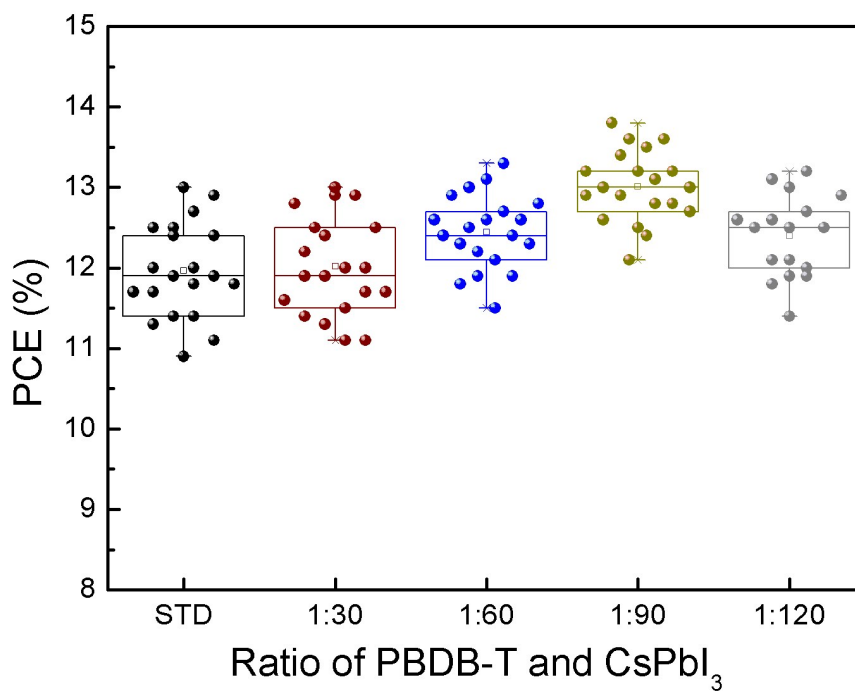

Figure S5. PCE summary of CsPbI<sub>3</sub> QD solar cells devices using PBDB-T/QD hybrid layer with varying blend weight ratios (20 devices for each condition).

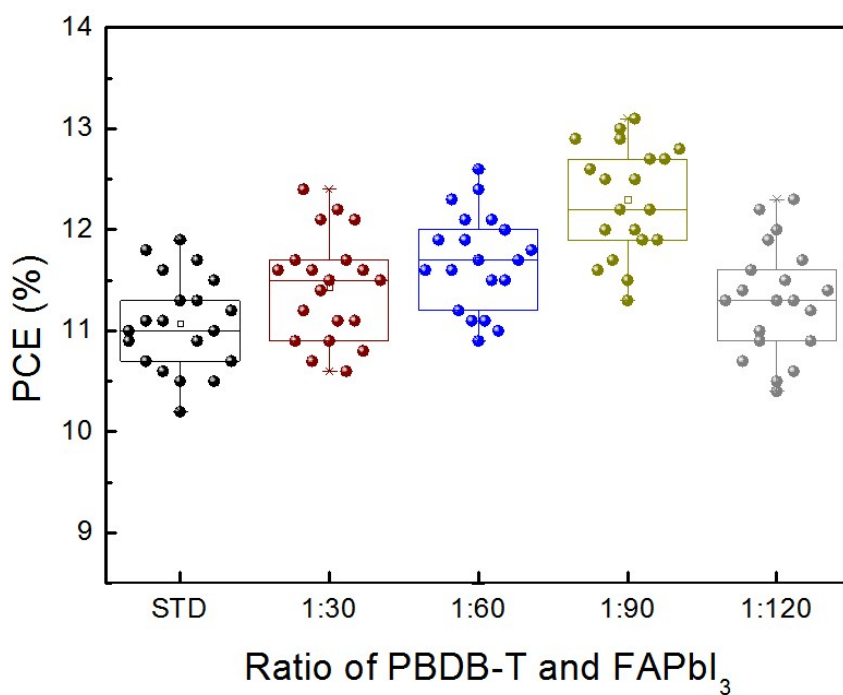

Figure S6. PCE summary of FAPbI<sub>3</sub> QD solar cells devices using PBDB-T/PQD hybrid layer with varying blend weight ratios (20 devices for each condition).

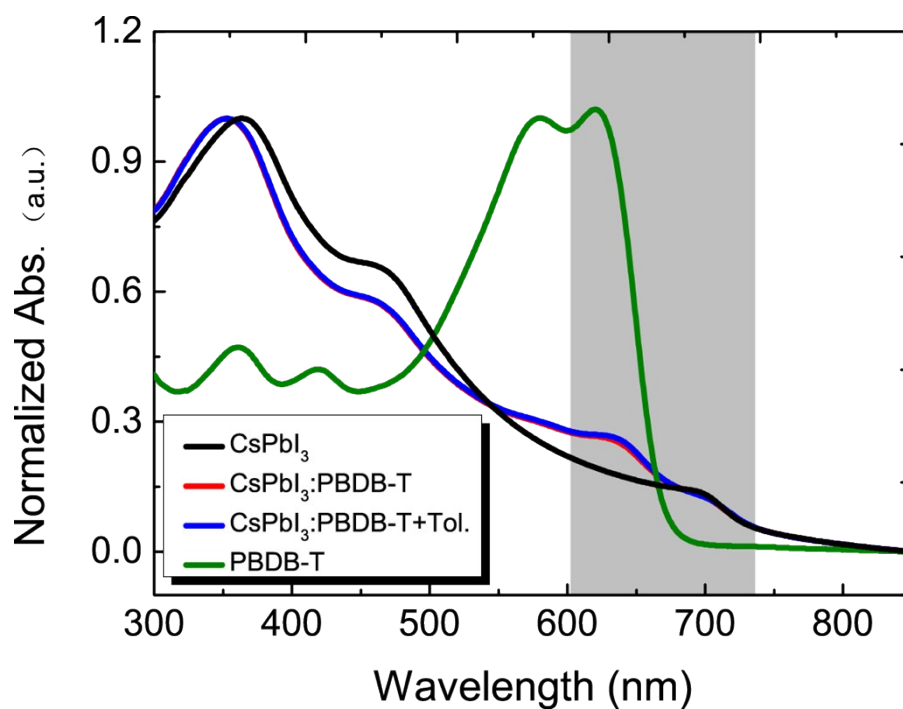

Figure S7. Normalized thin-film absorbance of neat CsPbI<sub>3</sub> QDs, PBDB-T+CsPbI<sub>3</sub> BHJ, PBDB-T+CsPbI<sub>3</sub> BHJ after toluene treatment and pristine PBDB-T.

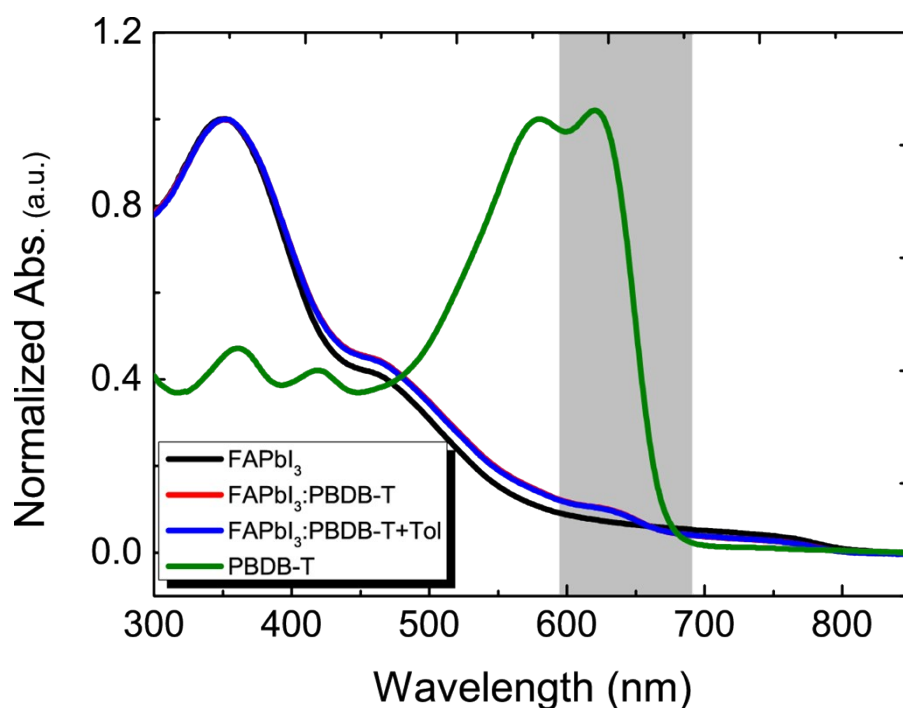

Figure S8. Normalized thin-film absorbance of neat FAPbI<sub>3</sub> QDs, PBDB-T+ FAPbI<sub>3</sub> BHJ, PBDB-T+ FAPbI<sub>3</sub> BHJ after toluene treatment and pristine PBDB-T.

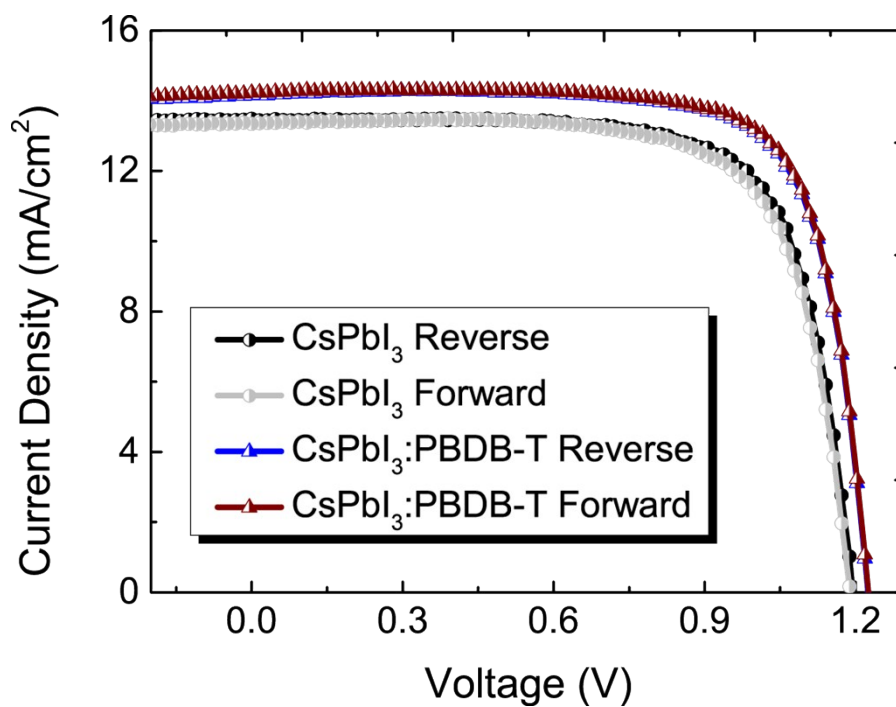

Figure S9. *J-V* curves of forward and reverse scan of CsPbI<sub>3</sub> PQD solar cell devices w/wo PBDB-T/QD hybrid layer.

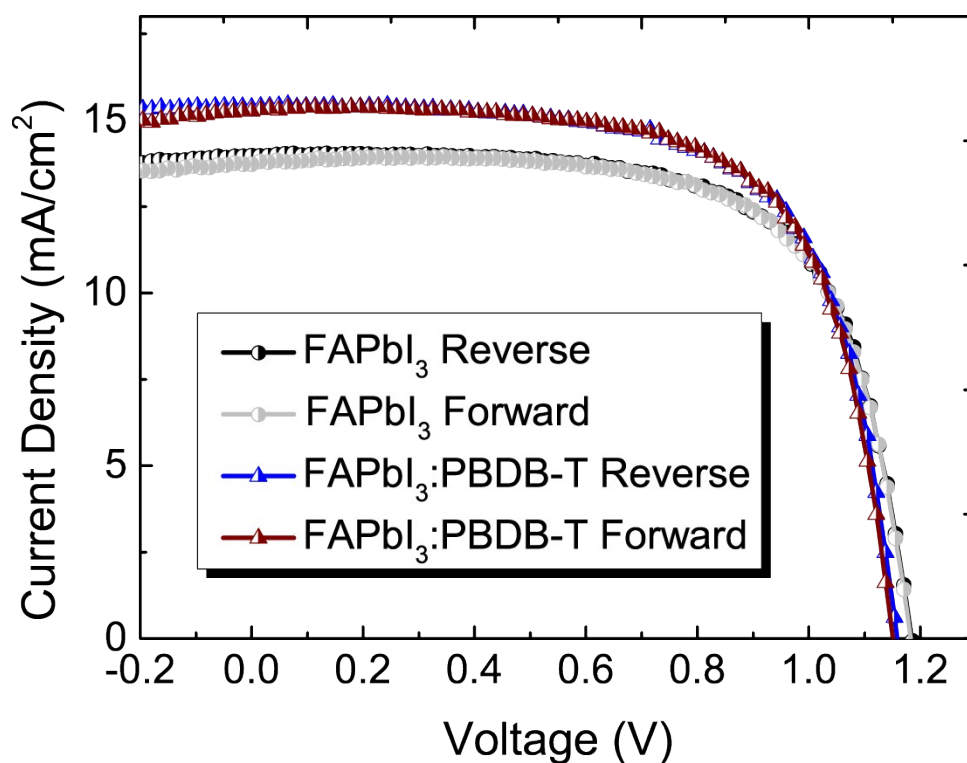

Figure S10. *J-V* curves of forward and reverse scan of neat FAPbI<sub>3</sub> PQD solar cell devices w/wo PBDB-T/QD hybrid layer.



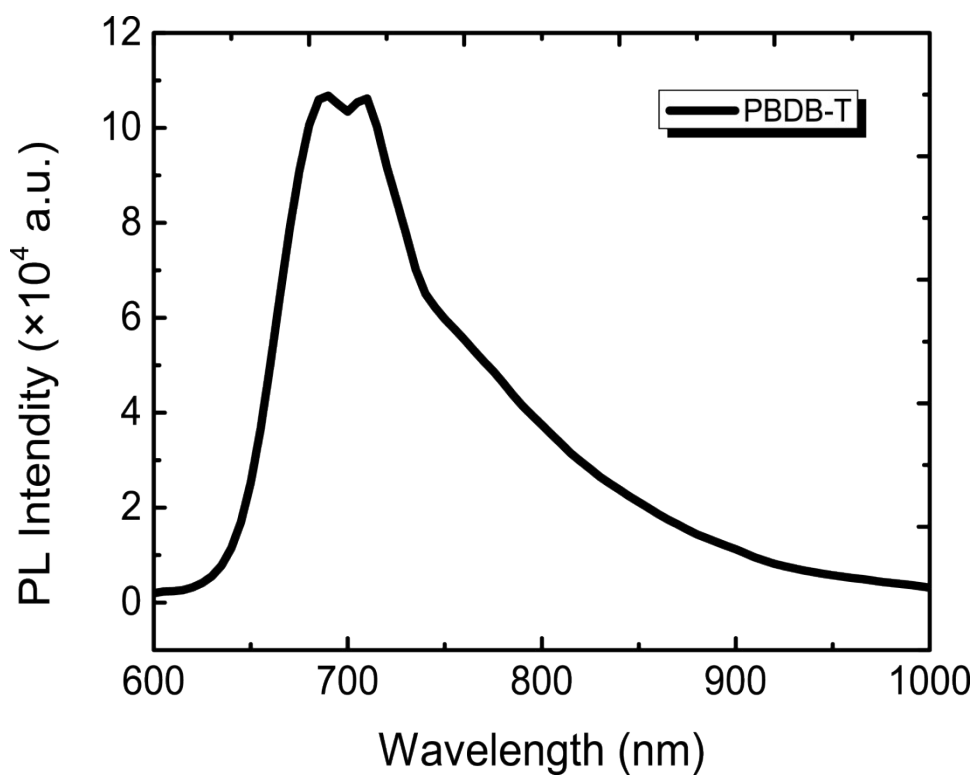

Figure S11. Steady-state photoluminescence (PL) spectrum of neat PBDB-T films

Table S1. Device parameters of CsPbI<sub>3</sub> PQD solar cells using PBDB-T/QD hybrid layer with varying blend weight ratios.

| PBDB-T:CsPbI <sub>3</sub> | $J_{sc}$<br>(mA/cm <sup>2</sup> ) | $V_{oc}$<br>(V) | FF   | PCE<br>(%) |
|---------------------------|-----------------------------------|-----------------|------|------------|
| w/o                       | 13.7                              | 1.22            | 0.77 | 12.8       |
| 1:30                      | 14.5                              | 1.22            | 0.73 | 12.9       |
| 1:60                      | 14.6                              | 1.22            | 0.75 | 13.4       |
| 1:90                      | 15.1                              | 1.22            | 0.75 | 13.8       |
| 1:120                     | 14.0                              | 1.23            | 0.75 | 12.9       |

Table S2. Device parameters of FAPbI<sub>3</sub> PQD solar cells using PBDB-T/QD hybrid layer with varying blend weight ratios.

| PBDB-T:FAPbI <sub>3</sub> | $J_{sc}$<br>(mA/cm <sup>2</sup> ) | $V_{oc}$<br>(V) | FF   | PCE<br>(%) |
|---------------------------|-----------------------------------|-----------------|------|------------|
| w/o                       | 14.0                              | 1.20            | 0.69 | 11.6       |
| 1:30                      | 16.7                              | 1.13            | 0.64 | 12.1       |
| 1:60                      | 16.7                              | 1.12            | 0.68 | 12.7       |
| 1:90                      | 16.7                              | 1.12            | 0.70 | 13.2       |
| 1:120                     | 15.8                              | 1.14            | 0.65 | 11.7       |

Table S3. Detail data of EIS parameters

| Conditions                 | $R_s$ ( $\Omega$ ) | $R_1$ ( $\Omega$ ) |
|----------------------------|--------------------|--------------------|
| CsPbI <sub>3</sub>         | 36.36              | 14690              |
| CsPbI <sub>3</sub> -PBDB-T | 26.72              | 21620              |
| FAPbI <sub>3</sub>         | 50.64              | 23170              |
| FAPbI <sub>3</sub> -PBDB-T | 30.54              | 27500              |

#### Reference

1. J. Yuan, H. Dong, M. Li, X. Huang, J. Zhong, Y. Li and W. Ma, *Adv. Mater.*, 2014, **26**, 3624-3630.
